# Supplementary material
Source: PubMed Central journal article supplement (PMC3568946)
Supplement: NIHMS424231-supplement-125_2012_2782_MOESM1_ESM.pdf [file NIHMS424231-supplement-125_2012_2782_MOESM1_ESM.pdf]

**ESM Table1.** Sequences of the oligonucleotide primers used for real-time RT-PCR

| <b>Gene</b> | <b>Accession number</b> | <b>Protein coded</b> | <b>Forward primer (5'-3')</b> | <b>Reverse primer (5'-3')</b> |
|-------------|-------------------------|----------------------|-------------------------------|-------------------------------|
| Ptpn1       | NM_011201.3             | PTP1B                | CAAACACATGTGGGCACTTC          | CCTTTTCTTCTTGCTGTGGC          |
| Hspa5       | NM_001163434            | GRP78                | TGCAGCAGGACATCAAGTTC          | TTTCTTCTGGGGCAAATGTC          |
| Ddit3       | NM_007837               | CHOP                 | GGAGGTCCTGTCCTCAGATG          | CTGTCAGCCAAGCTAGGGAC          |
| Rn18s       | NR_003278               | 18s rRNA             | GTAACCCGTTGAACCCCAT           | CCA TCCAATCGGTAGTAGCG         |
