# Supplementary material
Source: PubMed Central journal article supplement (PMC3568946)
Supplement: NIHMS424231-supplement-125_2012_2782_MOESM2_ESM.pdf [file NIHMS424231-supplement-125_2012_2782_MOESM2_ESM.pdf]

## ESM Figure 1

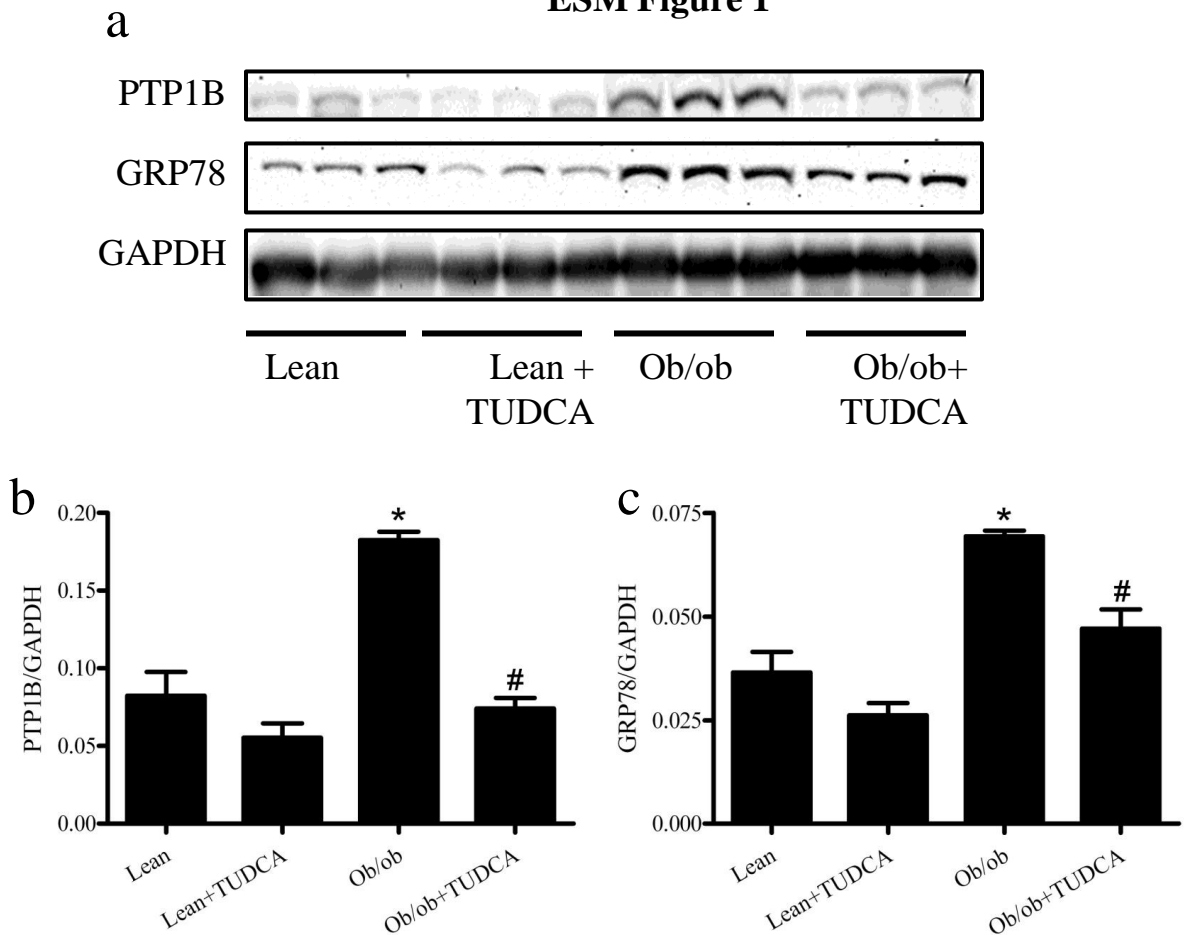

**ESM Figure 1. Obesity induced ER stress leads to increased PTP1B expression in liver.** Western blot analysis of PTP1B and GRP78 protein levels in liver of 7-week-old *ob/ob* and C57BL/6J lean mice received TUDCA. (a) Representative blots; (b, c) densitometric analysis (n=3) of PTP1B and GRP78 protein levels normalized to GAPDH levels. \*p<0.01 compared with lean mice, #p<0.01 compared with *ob/ob* mice.
