# Supplementary material
Source: PubMed Central journal article supplement (PMC3568946)
Supplement: NIHMS424231-supplement-125_2012_2782_MOESM3_ESM.pdf [file NIHMS424231-supplement-125_2012_2782_MOESM3_ESM.pdf]

## ESM Figure 2

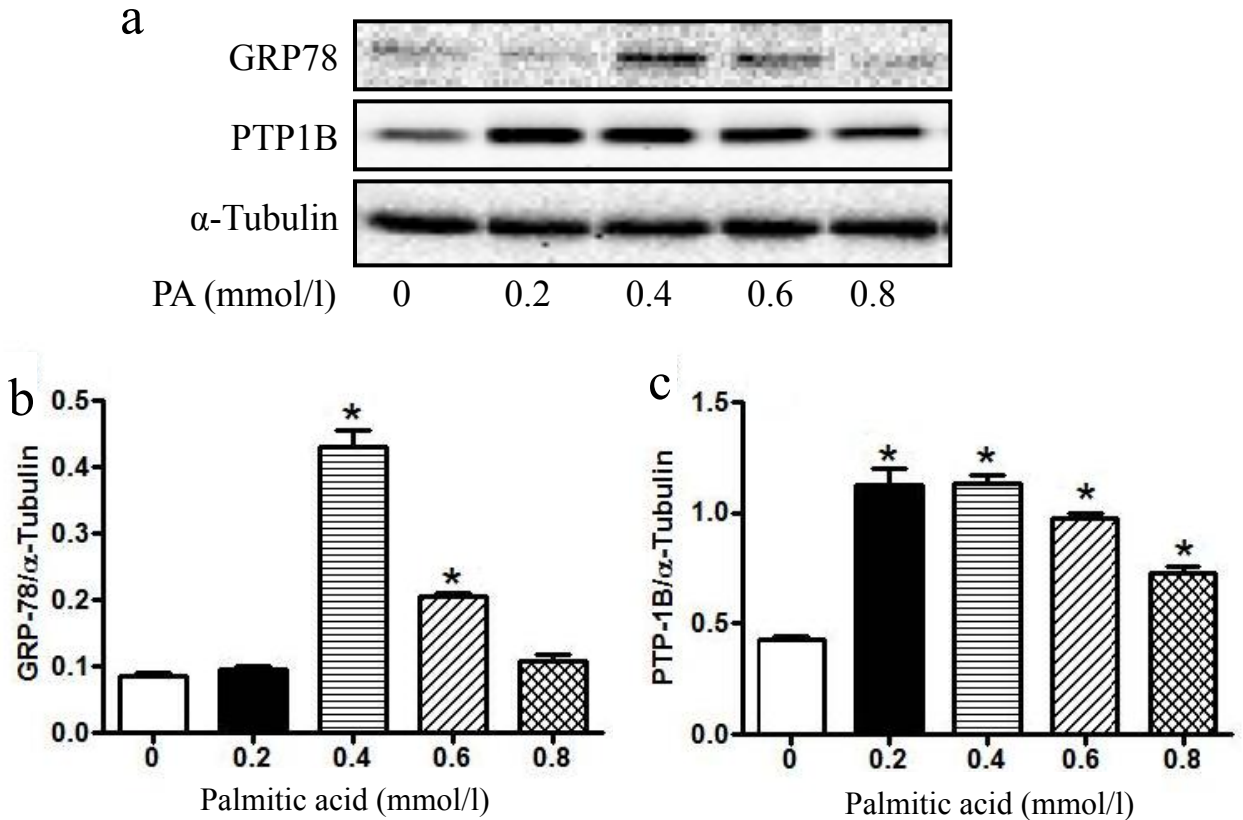

**ESM Figure 2. Palmitic acid induced ER stress and PTP1B expression in cultured myotubes.** Western blot analysis of PTP1B and GRP78 protein expression in C2C12 myotubes, incubated with 0.2, 0.4, 0.6, and 0.8 mmol/l of palmitic acid (PA) for a period of 24 hours. (a) Representative Western blots and densitometric analysis (n=3) for (b) GRP78 and (c) PTP1B. \* $p < 0.01$  compared with non-treated control.
