# Supplementary material
Source: PubMed Central journal article supplement (PMC3568946)
Supplement: NIHMS424231-supplement-125_2012_2782_MOESM4_ESM.pdf [file NIHMS424231-supplement-125_2012_2782_MOESM4_ESM.pdf]

### ESM Figure 3

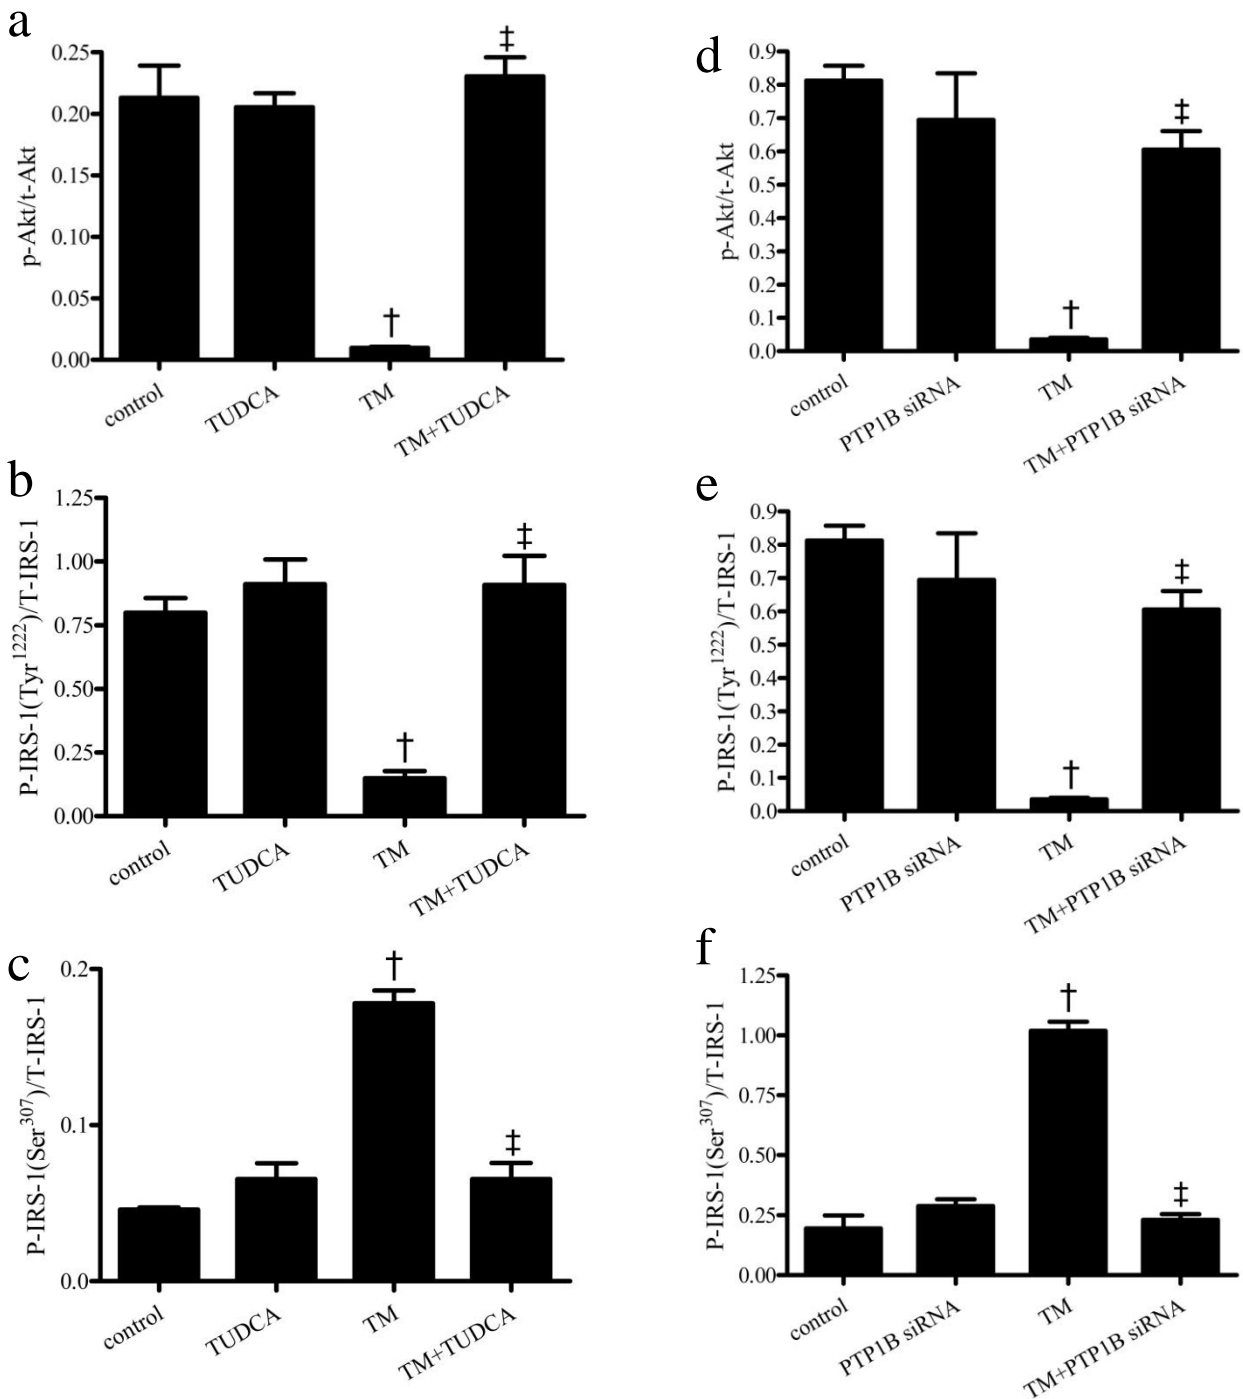

**ESM Figure 3. The effect of TUDCA and PTP1B siRNA on insulin signaling in C2C12 cells treated with TM.** Protein expression of molecules mediating insulin signaling pathway was evaluated using Western Blot analysis in insulin stimulated (50 nmol/l, 30 min) C2C12 myotubes, incubated with TM and treated with TUDCA (a-c) or PTP-1B siRNA (d-f) for 24 hours (48 hours for siRNA experiment). Densitometric analysis (n=3) for (a,d) phospho-Akt, (b,e) phospho-IRS-1 (Tyr<sup>1222</sup>), (c,f) phospho-IRS-1 (Ser<sup>307</sup>). Values were normalized to total levels of Akt and IRS-1. †p<0.05 compared with insulin stimulated control cells, ‡p<0.05 compared with TM+insulin treated cells
